# Supplementary material
Source: publisher site journal article supplement (https://www.spandidos-publications.com/5305/downloadSupplementary)

Figure S1. Further Pearson's correlation analyses between the pathological records of the intra-tumoral programmed death ligand 1 evaluation (continuous variable TPS) and (A) CD16-positive exosomes and (B) CD16<sup>+</sup> IM and (C) NCM revealed ns correlations. TPS, tumor positivity score; IM, intermediate monocytes; NCM, non-classical monocytes; ns, no significance.

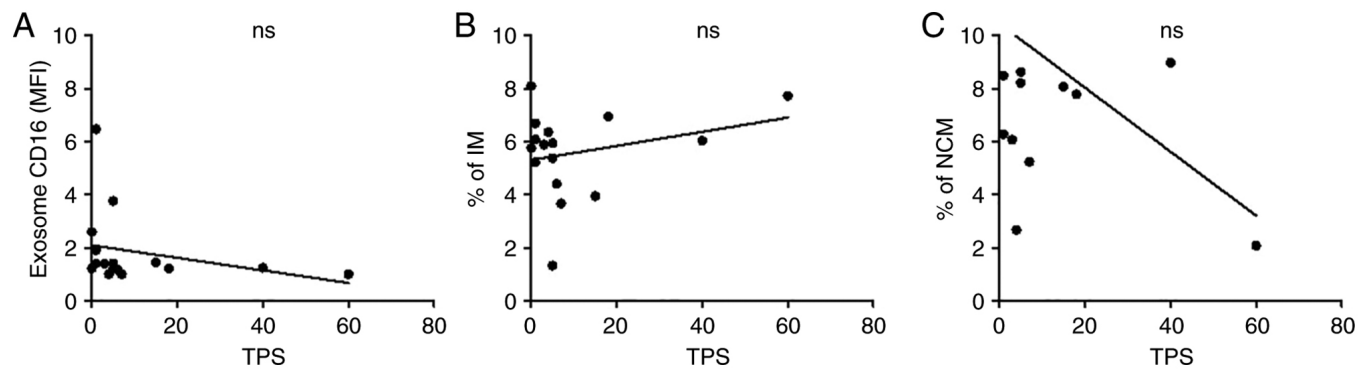

Figure S2. Analysis of CD16<sup>+</sup> exosomes from HPV-positive and HPV-negative patients using unpaired Student's t-test revealed no significant differences (ns). MFI, mean fluorescence intensity; HPV, human papillomavirus.

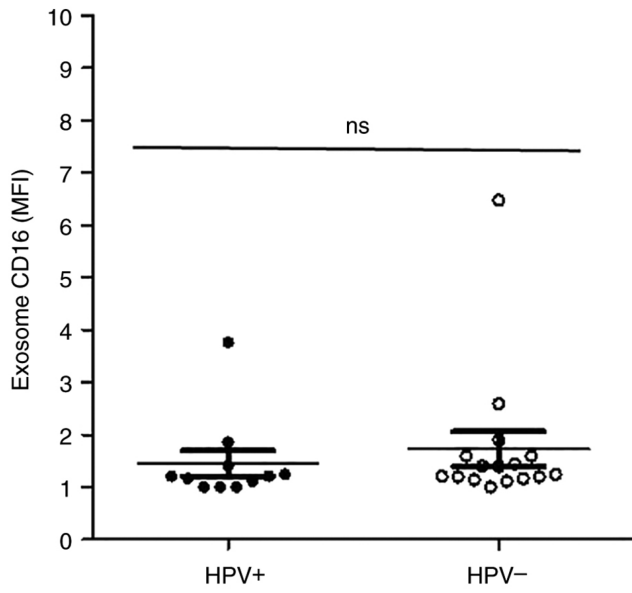

Supplement: Supplementary file 1 [file downloadSupplementary]
